# Supplementary material for: Circuit and synaptic organization of forebrain-to-midbrain pathways that promote and suppress vocalization
Source: eLife journal article supplement (doi:10.7554/elife.63493), 2020-12-29
Supplement: supp [file elife-63493-supp-v1.zip]

Archive with 26 entries (26 files):
- elife_poa_e63493_Transparent_Reporting_File.docx
- elife_poa_e63493_Figure_1_source_data_1.docx
- elife_poa_e63493_Figure_1_source_data_2.xlsx
- elife_poa_e63493_Figure_2_source_data_1.xlsx
- elife_poa_e63493_Figure_3_source_data_1.xlsx
- elife_poa_e63493_Figure_4_source_data_1.xlsx
- elife_poa_e63493_Figure_5_source_data_1.xlsx
- elife_poa_e63493_Figure_6_source_data_1.xlsx
- elife_poa_e63493_Figure_2_figure_supplement_1_source_data_1.xlsx
- elife_poa_e63493_Figure_2_figure_supplement_2_source_data_1.xlsx
- elife_poa_e63493_Figure_6_figure_supplement_1_source_data_1.xlsx
- elife_poa_e63493_Video_1.mp4
- elife_poa_e63493_Video_2.mp4
- elife_poa_e63493_Video_3.mp4
- elife_poa_e63493_Video_4.mp4
- elife_poa_e63493_Video_5.mp4
- elife_poa_e63493_Figure_1_figure_supplement_1.pdf
- elife_poa_e63493_Figure_1_figure_supplement_2.pdf
- elife_poa_e63493_Figure_1_figure_supplement_3.pdf
- elife_poa_e63493_Figure_1_figure_supplement_4.pdf
- elife_poa_e63493_Figure_2_figure_supplement_1.pdf
- elife_poa_e63493_Figure_2_figure_supplement_2.pdf
- elife_poa_e63493_Figure_2_figure_supplement_3.pdf
- elife_poa_e63493_Figure_4_figure_supplement_1.pdf
- elife_poa_e63493_Figure_4_figure_supplement_2.pdf
- elife_poa_e63493_Figure_6_figure_supplement_1.pdf
