# Supplementary material for: Circuit and synaptic organization of forebrain-to-midbrain pathways that promote and suppress vocalization
Source: eLife journal article supplement (doi:10.7554/elife.63493), 2020-12-29

Figure 1-figure supplement 3: Monosynaptic rabies-based tracing reveals additional hypothalamic inputs to the midbrain vocalization circuit.

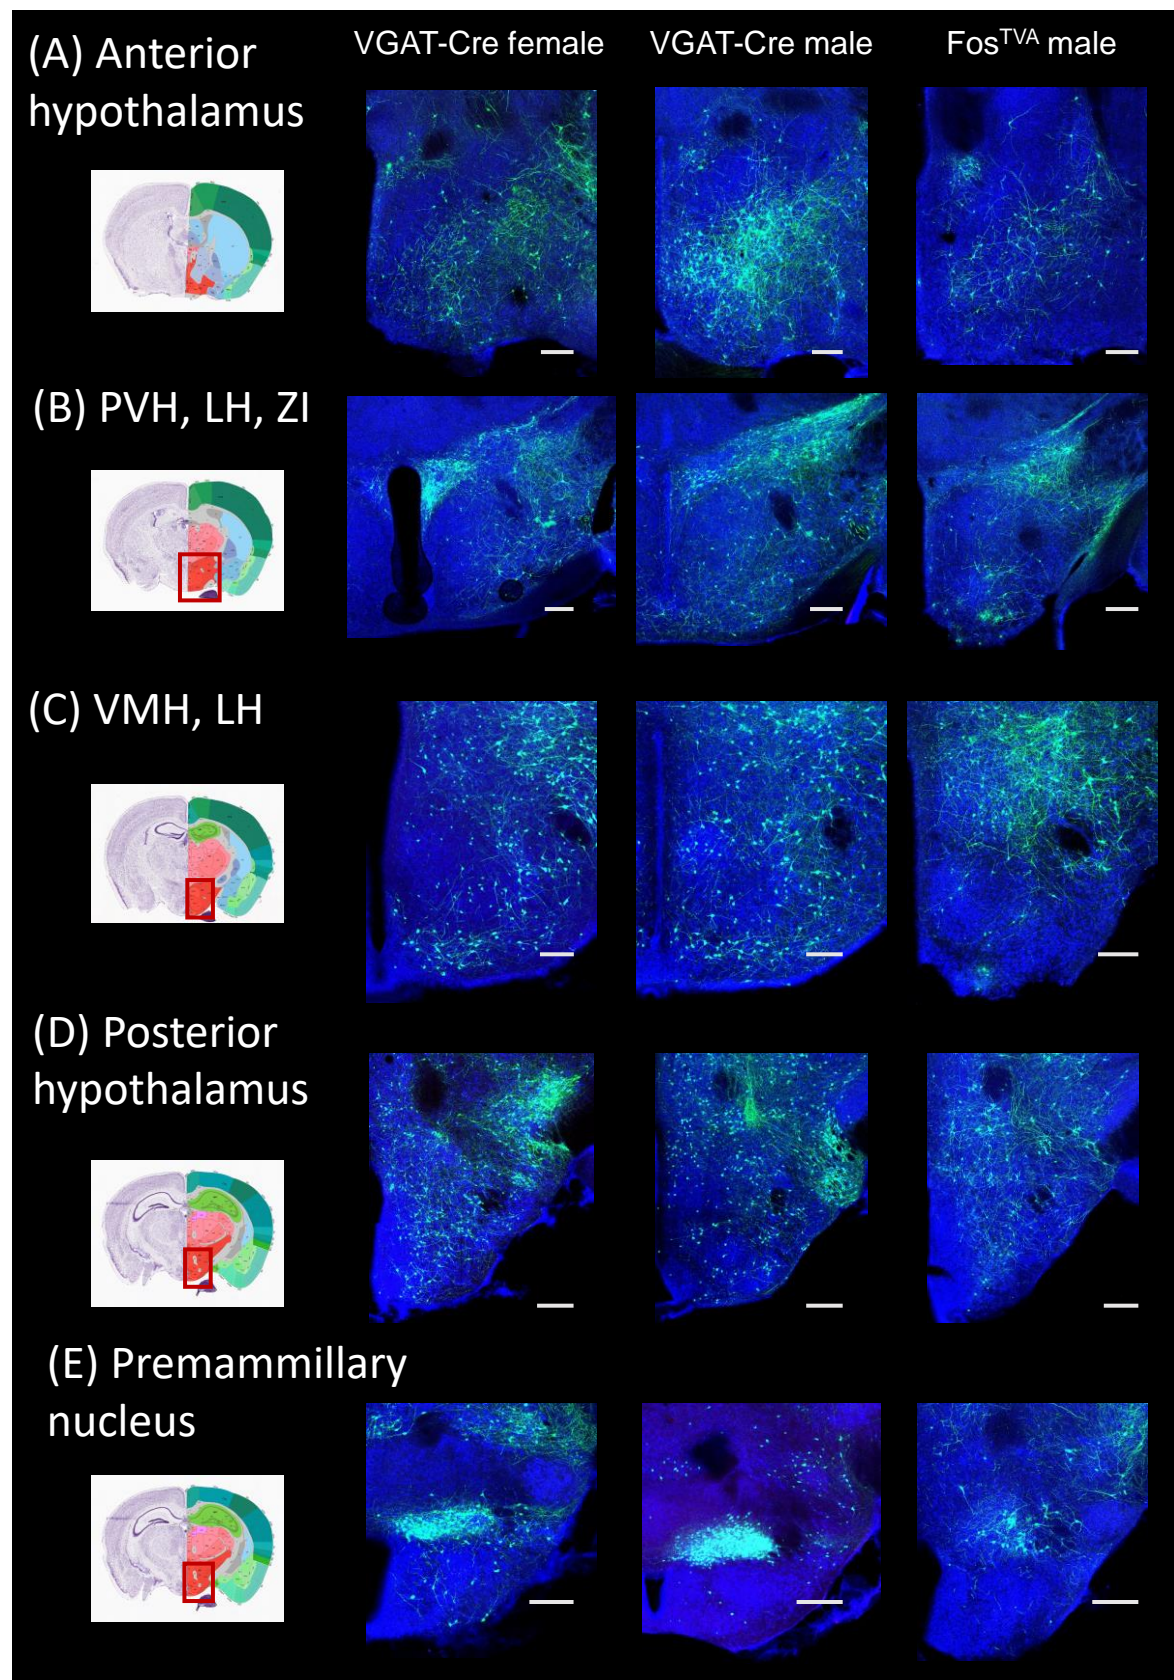

Supplement: supp [file elife-63493-supp-v1.zip › elife_poa_e63493_Figure_1_figure_supplement_3.pdf]
