# Supplementary material for: Circuit and synaptic organization of forebrain-to-midbrain pathways that promote and suppress vocalization
Source: eLife journal article supplement (doi:10.7554/elife.63493), 2020-12-29
Supplement: supp [file elife-63493-supp-v1.zip › elife_poa_e63493_Figure_1_source_data_2.xlsx]

## Sheet: ISH Scoring Summary
	tracing from PAG-USV neurons					tracing from GABAergic PAG neurons
	POA neurons					POA neurons
	mouse ID	VGAT+	vglut2+	total		mouse ID	VGAT+	vglut2+	total			for stacked bar chart
	TVA126	38	16	54		VM111	150	29	179
	TVA 127	43	6	49		VM112	167	26	193				VGAT	Vglut
											from PAG-USV	POA	0.786408	0.213592
		81	22	103			317	55	372			amygdala	1	0
	proportion of total	0.786408	0.213592			proportion of total	0.852151	0.147849			from PAG-GABA	POA	0.852151	0.147849
												amygdala	0.985981	0.0140187
	amygdala neurons					amygdala neurons
	mouse ID	VGAT	vglut2	total		mouse ID	VGAT+	vglut2+	total
	TVA126	36	0	36		VM111	198	6	204
	TVA 127	53	0	53		VM112	236	6	242
		89	0	89			434	12	446
	proportion of total	1	0			proportion of total	0.973094	0.0269058
		summary across tracing from both cell types
		POA neurons					CeA and EA neurons
			VGAT	vglut2	total			VGAT	vglut2	total
		TVA126	38	16	54		TVA126	36	0	36
		TVA 127	43	6	49		TVA 127	53	0	53
			VGAT	vglut2	total			VGAT	vglut2	total
		VM111	150	29	179		VM111	198	6	204
		VM112	167	26	193		VM112	236	6	242
			398	77	475			523	12	535
			0.837895					0.97757

## Sheet: tracing from PAG-USV (N=2)
mouse 1, TVA 126
POA neurons					amygdala neurons
section number	VGAT+	Vglut+	total neurons scored		section number	VGAT+	Vglut+	total neurons scored
last section 10x	12	4	16		slide 1 section 007	2	0	2
minus one	5	7	12		slide 1 section 008	5	0	5
minus two	5	1	6		slide 1 section 009	5	0	5
minus three	7	4	11		slide 1 section 011	5	0	5
section 011	5	0	5		slide 1 section 012	1	0	1
section 004	4	0	4		slide 1 section 013	11	0	11
					slide 1 section 014	4	0	4
total	38	16	54		slide 1 section 015	3	0	3
proportion total	0.703704	0.296296
					total	36	0	36
					proportion total	1
mouse 2, TVA 127
POA neurons					amygdala neurons
section number	VGAT+	Vglut+	total neurons scored		section number	VGAT+	Vglut+	total neurons scored
slide 1 section 007	2	0	2		slide 2 section 002	1	0	1
slide 1 section 008	2	4	6		slide 2 section 005	1	0	1
slide 1 section 009	2	1	3		slide 2 section 006	2	0	2
slide 1 section 010	0	0	0		slide 2 section 007	1	0	1
slide 1 section 011	9	0	9		slide 2 section 011	14	0	14
slide 1 section 012	11	1	12		slide 2 section 012	6	0	6
slide 1 section 013	5	0	5		slide 2 section 013	12	0	12
slide 1 section 014	12	0	12		slide 2 section 014	13	0	13
					slide 2 section 015	3	0	3
total	43	6	49
proportion total	0.877551	0.122449			total	53	0	53
					proportion total	1

## Sheet: tracing from PAG-GABA (N=2)
	mouse 1, VM111
	POA neurons					amygdala neurons
	section number	VGAT+	Vglut+	total neurons scored		section number	VGAT+	Vglut+	total neurons scored
	slide 2 section 001	80	9	89		slide 2 section 007	37	3	40
	slide 2 section 003	40	12	52		slide 2 section 010	34	3	37
	slide 1 section 012	30	8	38		slide 2 section 013	75	0	75
						slide 2 section 015	52	0	52
	total	150	29	179
	proportion total	0.837989	0.162011			total	198	6	204
						proportion total	0.970588	0.0294118
	mouse 1, VM112
	POA neurons					amygdala neurons
	section number	VGAT+	Vglut+	total neurons scored		section number	VGAT+	Vglut+	total neurons scored
	slide 1 section 008	86	14	100		slide 2 section 001	55	2	57
	slide 1 section 001	81	12	93		slide 2 section 002	68	4	72
						slide 2 section 007	55	0	55
	total	167	26	193		slide 2 section 008	58	0	58
	proportion total	0.865285	0.134715
						total	236	6	242
						proportion total	0.975207	0.0247934
