# Supplementary material for: Circuit and synaptic organization of forebrain-to-midbrain pathways that promote and suppress vocalization
Source: eLife journal article supplement (doi:10.7554/elife.63493), 2020-12-29
Supplement: supp [file elife-63493-supp-v1.zip › elife_poa_e63493_Figure_2_figure_supplement_1_source_data_1.xlsx]

## Sheet: Latency to USV summary (Fig S6B
latencies from opto stim to first USV
		median	mean (ms)	min															VM113 latencies		VM31
retro-Cre POA ChR2	VM30	2.2999	1.9883	0.7416															0.004784		0.012384
	VM31 (180409)	0.9883	1.1385	0.179968															0.006944		0.163824	hard to interpret, many H's in a row
	VM151	1.2155	1.3135	0.2592															0.007808		0.179968
	VM152	0.7263	0.9495	0.1292															0.010992		0.202384
	VM222	0.3947	0.7543	0.253															0.01408		0.210112
	VM221	1.8146	1.7518	0.266															0.019456		0.241312
	VM227	1.5568	1.6906	0.2319															0.023856		0.263568
	VM253	5.5627	5.5627	5.2447															0.026912		0.275664
	VM254	7.5592	6.0499	1.7312															0.031872		0.28296
																			0.043728		0.304128
																			0.04688		0.34368
Esr1 POA ChR2	VM113 (190118)	0.5167	0.5648	0.1382															0.05104		0.344032
	VM114	2.125	1.7862	0.1463															0.056512		0.395424
	VM132	0.5067	0.675	0.1147															0.060624		0.402384
	VM162	1.0374	1.2183	0.3099															0.061744		0.402384
	KAT012	1.097	1.2975	0.3955															0.065136		0.523152
	VM177	0.5135	0.685	0.2079															0.07552		0.53192
	VM178	1.0216	1.0954	0.2833															0.096		0.550928
																			0.0972		0.574032
Esr1 terminals ChR2	VM240	9.225	7.7585	2.5912															0.1048		0.587536
	VM241	0.8543	0.8995	0.2259															0.104912		0.589872
	VM233	2.2783	2.1942	0.7167															0.104976		0.592384
	VM215	1.9939	2.0931	1.006															0.109216		0.606992
	VM251	8.0409	8.0376	6.2532															0.123312		0.615728
																			0.132192		0.622336
																			0.13936		0.623568
																			0.14936		0.628688
																			0.192496		0.638832
																			0.201632		0.642192
																			0.207264		0.645888
																			0.215216		0.64672
																			0.237808		0.649232
																			0.238096		0.64984
																			0.238736		0.65184
																			0.246576		0.652
																			0.24792		0.655344
																			0.25032		0.656528
																			0.25264		0.658432
																			0.261152		0.65848
																			0.292816		0.659584
																			0.3028		0.66024
																			0.315984		0.665184
																			0.322352		0.677168
																			0.3244		0.67832
																			0.32792		0.679824
																			0.32984		0.685936
																			0.336544		0.692048
																			0.350192		0.694848
																			0.3896		0.698912
																			0.43072		0.700096
																			0.468432		0.700784
																			0.473136		0.704128
																			0.489152		0.704768
																			0.495552		0.705536
																			0.497152		0.705856
																			0.49792		0.70776
																			0.507696		0.708432
																			0.508944		0.716912
																			0.543632		0.721488
																			0.554768		0.726288
																			0.595056		0.727264
																			0.601776		0.730592
																			0.62656		0.735968
																			0.629984		0.747984
																			0.636848		0.748832
																			0.644144		0.762848
																			0.646224		0.773888
																			0.662928		0.775264
																			0.677968		0.781232
																			0.680544		0.785952
																			0.686672		0.78744
																			0.703248		0.787728
																			0.720048		0.788032
																			0.729952		0.789664
																			0.756784		0.793872
																			0.77112		0.802384
																			0.784352		0.824032
																			0.838144		0.836624
																			0.856016		0.88608
																			0.895392		0.901984
																			0.898992		0.905424
																			0.94888		0.923312
																			0.952064		0.956496
																			0.981184		1.02006
																			1.0177		1.03109
																			1.04066		1.03526
																			1.04891		1.04901
																			1.05682		1.05178
																			1.0808		1.05795
																			1.09832		1.06563
																			1.10363		1.06758
																			1.12886		1.074
																			1.25918		1.08986
																			2.13563		1.09902
																			2.26435		1.10198
																			NaN		1.10414
																					1.10675
																					1.10853
																					1.10878
																					1.11165
																					1.12326
																					1.12494
																					1.12683
																					1.12688
																					1.12853
																					1.13104
																					1.13206
																					1.13424
																					1.14179
																					1.14192
																					1.14642
																					1.14973
																					1.14998
																					1.15574
																					1.15627
																					1.15651
																					1.15848
																					1.16546
																					1.16616
																					1.16803
																					1.17189
																					1.17624
																					1.18214
																					1.18669
																					1.19208
																					1.19282
																					1.20362
																					1.21034
																					1.22562
																					1.23194
																					1.23342
																					1.24403
																					1.28368
																					1.28381
																					1.34357
																					1.56502
																					1.84542
																					1.98614
																					2.00304
																					2.06403
																					2.0769
																					2.08456
																					2.11357
																					2.1431
																					2.16627
																					2.17267
																					2.1823
																					2.25299
																					2.31368
																					2.31786
																					2.41702
																					2.4451
																					2.51312
																					2.54486
																					2.54542
																					2.60752
																					2.63432
																					2.67747
																					2.68184
																					2.71795
																					2.91357
																					3.22754
																					3.34368
																					3.37526
																					3.62357
																					3.87424
																					NaN
																					NaN
																					NaN
																					NaN
																					NaN
																					NaN
																					NaN
																					NaN
																					NaN
																					NaN
																					NaN
																					NaN
																					NaN
																					NaN
																					NaN
																					NaN
																					NaN
																					NaN
																					NaN
																					NaN
																					NaN
																					NaN
																					NaN
																					NaN
																					NaN
																					NaN
																					NaN
																					NaN
																					NaN
																					NaN
																					NaN
																					NaN
																					NaN
																					NaN
																					NaN
																					NaN
																					NaN
																					NaN
																					NaN
																					NaN
																					NaN
																					NaN
																					NaN

## Sheet: All Bout Durations (Fig S6C)
			VM30	VM31	VM151	VM152	VM221	VM222	VM227		VM113	VM114	VM132	VM162	KAT012	VM177	VM178	VM240	VM241	VM233	VM251	VM240
Trials with 2s, 10Hz stim only			0.657627	7.62074	3.48156	1.37322	1.26002	0.596549	0.102219		3.79103	0.618943	N=1 2s-long stim with USVs	0.902626	2.42419	1.52157	1.37973	no USVs with 2s-long stim	1.84678	no USVs with 2s-long stim	no USVs with 2s-long stim	1.33
			1.00578	10.7541	3.80392	1.80525	6.47005	3.39606	1.15633		2.30814	0.19342		1.14762	0.902626	0.270788	1.14762		0			2.6
			0.892104	3.2643	4.03603	2.54025	3.40467	0.858657	0.00794547		6.61496	1.35394		0.373945	1.6892	2.66919	0.19342		3.49594			0.015
Mouse information			0.128947	3.18498	3.77813	3.04314	0.926869	0.00338105	0.0218078			0.504009		3.77813	1.46999	1.70209	4.55181		4.5
retro-Cre POA	trials included		1.16052	0.812363	4.50023	5.44154	0.934062	0.233051	1.32207			0.515786		5.00312	2.24367	2.52735	7.10495		7.6
VM30	7		0.244998	0.967099	3.3784	2.92709	0.991862	3.65656	0.687024			4.45965		1.50526	2.61761	1.82752	0.670522		0
VM31 (180409)	17		0.439638	0.257893	3.35683	2.32104	1.30992	0.922737	1.14326			0.180525		0.799468	0.322366	3.04314	2.1792		5.2
VM151	18			1.35394	1.6892	2.74656	0.111659	0.43799	0.00693115			0.451313		3.09472	1.26368	1.00578	1.54736		7
VM152	28			1.52471	3.97155	5.20944	0.295319		2.28665			2.15341		3.73945	0.618943	2.51446	0.799468		9.1
VM221	36			1.34104	3.81682	4.9244	0.0177505		2.81778			0.464207		2.06314	0.242991	3.12051	1.54736		8.3
VM222	8			2.24367	3.81682	3.70374	0.219224		0.0199482			0.451313		4.80971	0.47458	2.23077	1.80525		11.4
VM227	13			1.12183	4.48734	2.24367	1.18262		0.171567					2.79814	0.399734	1.77946	1.36683		8.1
				1.31525	7.33706	6.48601	0.92282		0.851126					1.31525	0.838152	3.32682	2.08029		1.01
Esr1 POA mice				0.348156	5.2997	2.51446	2.5502							4.85318	0.996229	2.12762	1.9733		2.9
VM113	3			0.502891	6.22812	7.50469	0.267013									2.07604	0.851047		2.02701
VM114	11			0.683417	5.71233	4.30681	1.43913									2.23077	1.70209		1.39315
VM132	N=1, excluded from plot			0.219209	4.89926	2.47577	0.75156									2.35972	0.232104		1.15917
VM162	14				4.85484	5.69944	1.00093									3.11125	0.0902626		6.36518
KAT012	14					3.96546	1.16686									4.03603	1.59894		2.39974
VM177	33					2.39386	1.73967									1.2121	2.12762		0.99072
VM178	35					4.16497	0.0371915									2.46288	1.31525		1.89542
						2.72077	0.0177505									2.03735	3.36305		0.586752
Esr1 terminal mice						2.93998	2.1711									2.43709	2.57807		2.07565
VM240	no USVs with 2s-long stim, excluded from plot					3.90708	0.0114956									3.17208	1.90841		2.06899
VM241	29					2.23077	1.34508									3.53313	0.206314		0.961024
VM233	no USVs with 2s-long stim, excluded from plot					1.81815	0.405979									1.36683	0.322366		1.6471
VM251	no USVs with 2s-long stim, excluded from plot					2.79814	5.75467									2.55314	2.1792		2.36749
VM240	3					2.28503	0.0527444									1.83104	2.08893		1.99936
							0.664919									2.37262	0.322366		0.013312
							0.297569									2.35972	1.41841
							0.484314									2.23077	3.50735
							0.21159									3.16292	1.30236
							0.533297									3.22535	2.81114
							1.782										1.89862
							0.0158909										0.452636
							3.46433
