# Supplementary material for: Circuit and synaptic organization of forebrain-to-midbrain pathways that promote and suppress vocalization
Source: eLife journal article supplement (doi:10.7554/elife.63493), 2020-12-29

Figure 2-figure supplement 2: Additional information related to the optogenetic activation of POA<sub>PAG</sub> and POA-Esr1<sup>+</sup> neurons

A Real-time place preference tests

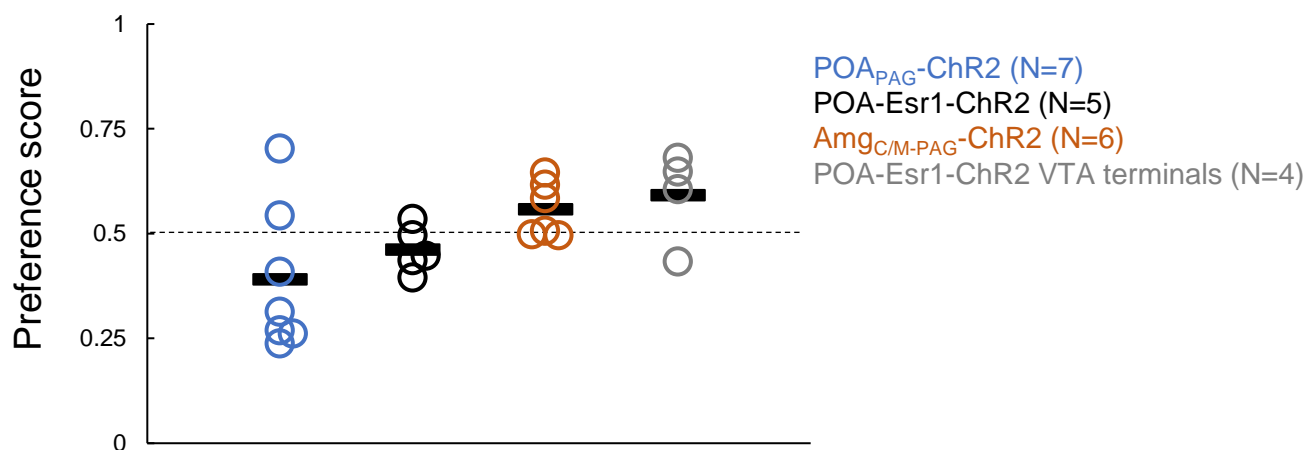

B Effects of optogenetic activation on movement

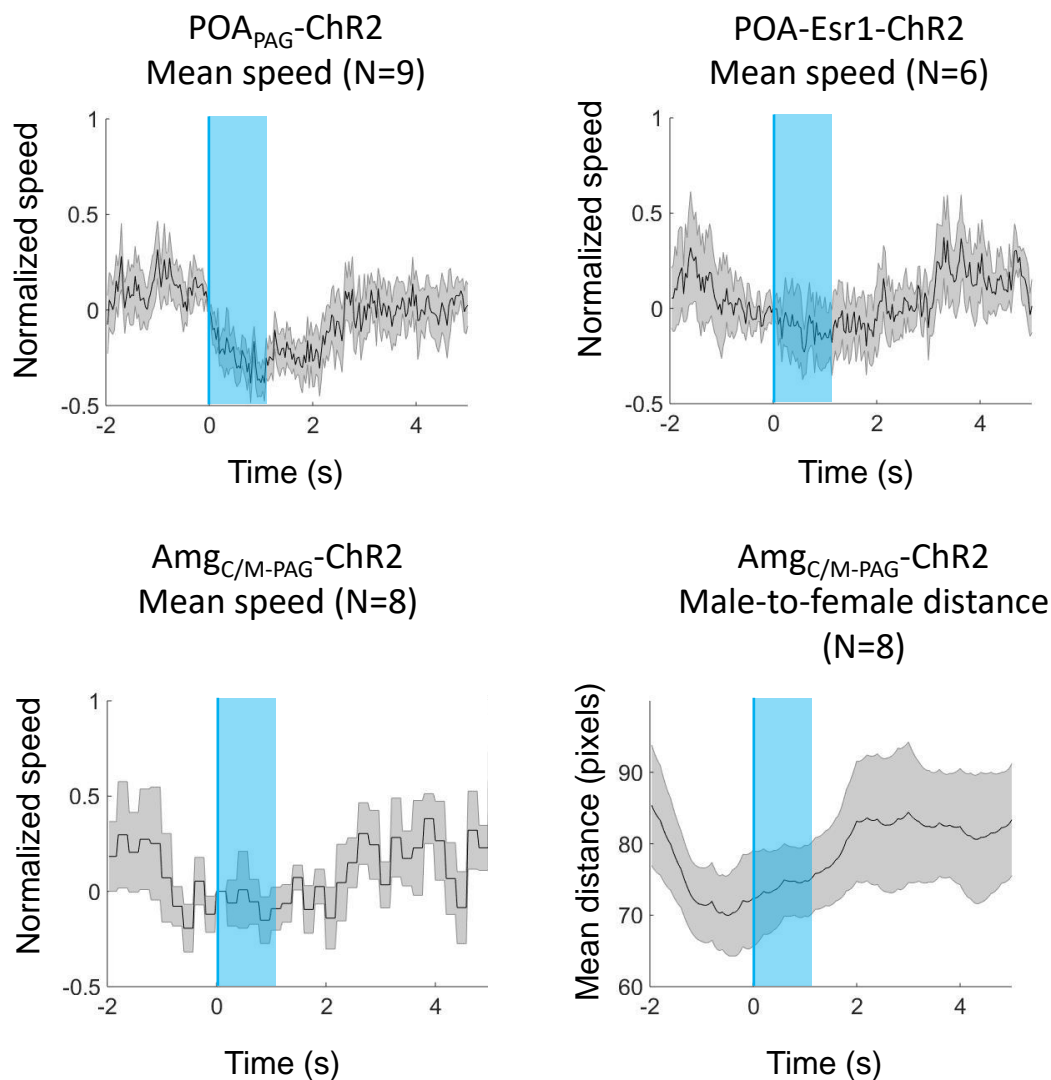

Supplement: supp [file elife-63493-supp-v1.zip › elife_poa_e63493_Figure_2_figure_supplement_2.pdf]
