# Supplementary material for: Circuit and synaptic organization of forebrain-to-midbrain pathways that promote and suppress vocalization
Source: eLife journal article supplement (doi:10.7554/elife.63493), 2020-12-29
Supplement: supp [file elife-63493-supp-v1.zip › elife_poa_e63493_Figure_2_figure_supplement_2_source_data_1.xlsx]

## Sheet: Place preference
	POA					amygdala				controls
	retro-Cre POA ChR2 mice					retro-Cre Amg ChR2 mice				CeA retro-FLEX-GFP
	20 min tests	proportion total time spent on each side				20 min tests				20 min tests
	mouse ID	opto side	control side			mouse ID	opto side	control side		mouse ID	opto side	control side
	VM151	0.261667	0.738333			VM159	0.506667	0.493333		VM205	0.180833	0.819167
	VM152	0.2375	0.7625			VM218	0.498333	(opto)		VM208	0.450833	0.549167
	VM221	0.543333	0.456667			VM169	0.645	0.355		VM209	0.601667	0.398333
	VM221	0.269167	0.730833			VM170	0.584167	0.415833		VM220	0.510833	0.489167
	VM227	0.408333	0.591667			VM185	0.495833	0.504167
	VM253	0.313333	0.686667			VM200	0.616667	0.383333		mean	0.436042	0.563958
	VM254	0.7025	0.2975
						mean	0.557778	0.430333
	mean	0.390833	0.609167							POA-VTA terminal stim
	Esr1-Cre POA ChR2 mice										opto side	control side
	mouse ID	opto side	control side							VM144	0.680833	0.319167
	KAT012	0.395	0.605							VM290	0.6475	0.3525
	VM177	0.495833	0.504167							VM291	0.433333	0.566667
	VM178	0.535	0.465							VM292	0.605657	0.394343
	VM138	0.446667	0.553333
	VM162	0.435833	0.564167							mean	0.591831	0.408169
	mean	0.461667	0.538333
