# Supplementary material for: Circuit and synaptic organization of forebrain-to-midbrain pathways that promote and suppress vocalization
Source: eLife journal article supplement (doi:10.7554/elife.63493), 2020-12-29
Supplement: supp [file elife-63493-supp-v1.zip › elife_poa_e63493_Figure_2_source_data_1.xlsx]

## Sheet: ISH (Fig 2C, N=2)
	mouse 1 (VM160)
	section number	positive for both	Esr1+ only	VGAT+ only	total scored
	slide 1 section 007	33	0	6	39
	slide 1 section 008	140	0	8	148
	total	173	0	14	187
	proportion total	0.925134	0	0.0748663
	mouse 2 (VM229)	positive for both	Esr1+ only	VGAT+ only	total scored
	slide 1 section 006	32	0	18	50
	slide 1 section 008	25	0	4	29
	slide 1 section 010	47	0	6	53
	total	104	0	28	132
	proportion total	0.787879		0.212121
	grand total	positive for both	Esr1+ only	VGAT+ only	total scored
	total	277	0	42	319
	proportion total	0.868339		0.131661

## Sheet: USVs (Fig. 2F, left, middle)
USVs per stim
viral strategy	mouse ID	proportion stim trials with USVs	USVs per second stim		Summary
retro-Cre	VM30	0.576271	2.30882			USVs/second stim	Proportion
	VM31	1	5.18966		POA->PAG	2.69016	0.580646
	VM151	0.555556	2.82727		Esr-1 Cre Cell Bodies	6.46049	0.626843
	VM152	0.5	3.0625		Esr-1 Cre Terminals	1.76569	0.49184
	VM222	0.426471	1.43103		Esr1 POA-GFP Control	0	0
	VM221	0.309091	2.52941		Vglut-Cre Control	0	0
	VM227	0.777778	1.71429		VMH Control	0	0
	VM253	0.5	2.45833		VTA Terminals Control	0	0
	VM254
Esr-1 Cre Cell Bodies	KAT012	0.625	3.67
	VM113	0.98913	17.1099
	VM114	0.116279	1.6
	VM132	0.772727	10.5588
	VM162	0.333333	4.125
	VM177	0.971429	5.07353
	VM178	0.58	3.08621
Esr-1 Cre Terminals	VM215	0.19697	0.538462
	VM233	0.75	2.44762
	VM240	0.208333	1.06
	VM241	0.818182	4.62353
	VM251	0.485714	0.158824
Controls		proportion stim trials with USVs	USVs per second stim
Esr1 POA-GFP	VM281	0	0
	VM282	0	0
	VM283	0	0
	VM284	0	0
	VM285	0	0
Vglut-Cre POA	VM32	0	0
	VM33	0	0
	VM34	0	0
VMH-PAG	VM 57	0	0
	VM 59	0	0
	VM 63	0	0
Esr1 VTA terminals	VM144	0	0
	VM146	0	0
	VM290	0	0
	VM291	0	0
	VM292	0	0

## Sheet: Latency (Fig. 2F, right)
latencies from opto stim to first USV
viral strategy	mouse ID	mean latency	min latency	median latency		summary by viral strategy
retro-Cre	VM30	1.9883	0.7416	2.2999				Mean latency
	VM31	1.1385	0.179968	0.9883		1	retro-Cre	2.35546
	VM151	1.3135	0.2592	1.2155		2	Esr-1 Cre Cell Bodies	1.04603
	VM152	0.9495	0.1292	0.7263		3	Esr-1 Cre Terminals	4.19658
	VM222	0.7543	0.253	0.3947
	VM221	1.7518	0.266	1.8146
	VM227	1.6906	0.2319	1.5568
	VM253	5.5627	5.2447	5.5627
	VM254	6.0499	1.7312	7.5592
Esr-1 Cre Cell Bodies	VM113	0.5648	0.1382	0.5167
	VM114	1.7862	0.1463	2.125
	VM132	0.675	0.1147	0.5067
	VM162	1.2183	0.3099	1.0374
	KAT012	1.2975	0.3955	1.097
	VM177	0.685	0.2079	0.5135
	VM178	1.0954	0.2833	1.0216
Esr-1 Cre Terminals	VM240	7.7585	2.5912	9.225
	VM241	0.8995	0.2259	0.8543
	VM233	2.1942	0.7167	2.2783
	VM215	2.0931	1.006	1.9939
	VM251	8.0376	6.2532	8.0409
