# Supplementary material for: Circuit and synaptic organization of forebrain-to-midbrain pathways that promote and suppress vocalization
Source: eLife journal article supplement (doi:10.7554/elife.63493), 2020-12-29
Supplement: supp [file elife-63493-supp-v1.zip › elife_poa_e63493_Figure_3_source_data_1.xlsx]

## Sheet: paired comparisons
			1	2
viral strategy	sex	mouse	MMD, fd-fd	MMD, fd-opto
retro-Cre	male	VM30	0.0102281	0.174785
retro-Cre	male	VM31	0.00575381	0.132882
retro-Cre	male	VM151	0.00258805	0.0260716
retro-Cre	male	VM152	0.00726531	0.0807166
retro-Cre	male	VM221	0.00284808	0.0303341
retro-Cre	male	VM222	0.0294739	0.00865097
		means	0.00969287	0.0755734
viral strategy	sex	mouse	MMD, fd-fd	MMD, fd-opto
Esr1 POA cell bodies	male	VM162	0.0100334	0.0129627
Esr1 POA cell bodies	male	VM113	0.00888013	0.0522709
Esr1 POA cell bodies	male	VM114	0.0149153	0.0786867
Esr1 POA cell bodies	female	KAT012	0.00694179	0.0859236
Esr1 POA cell bodies	female	VM177	0.00413387	0.0923111
Esr1 POA cell bodies	female	VM178	0.0109973	0.18522
		means	0.00931698	0.0845626
viral strategy	sex	mouse	MMD, fd-fd	MMD, fd-opto
Esr1 PAG terminals	male	VM233	0.0145586	0.0215359
Esr1 PAG terminals	female	VM240	0.0515692	0.0534212
Esr1 PAG terminals	female	VM241	0.00441795	0.017782
		means	0.0235153	0.030913
control mice	sex	mouse	MMD, fd-fd	MMD, fd-opto
no surgery	male	TVA_1	0.00202648	-----------------
no surgery	male	TVA_3	0.0588159	-----------------
no surgery	male	TVA_7	0.00206597	-----------------
no surgery	male	TVA_9	0.00391465	-----------------
no surgery	male	TVA_10	0.00178096	-----------------
no surgery	male	TVA_27	0.00128817	-----------------
no surgery	male	TVA_28	0.00425634	-----------------
no surgery	male	TVA_Ai14_het_1	0.0215294	-----------------
no surgery	male	TVA_Ai14_het_2	0.0157885	-----------------
no surgery	male	TVA_Ai14_het_3	0.139091	-----------------
