# Supplementary material for: Circuit and synaptic organization of forebrain-to-midbrain pathways that promote and suppress vocalization
Source: eLife journal article supplement (doi:10.7554/elife.63493), 2020-12-29

Figure 4-figure supplement 2: Comparison of hypothalamus and amygdala cell body labeling achieved after transsynaptic tracing from the PAG vocal gating circuit versus AAV-retro-Cre injection into the caudolateral PAG

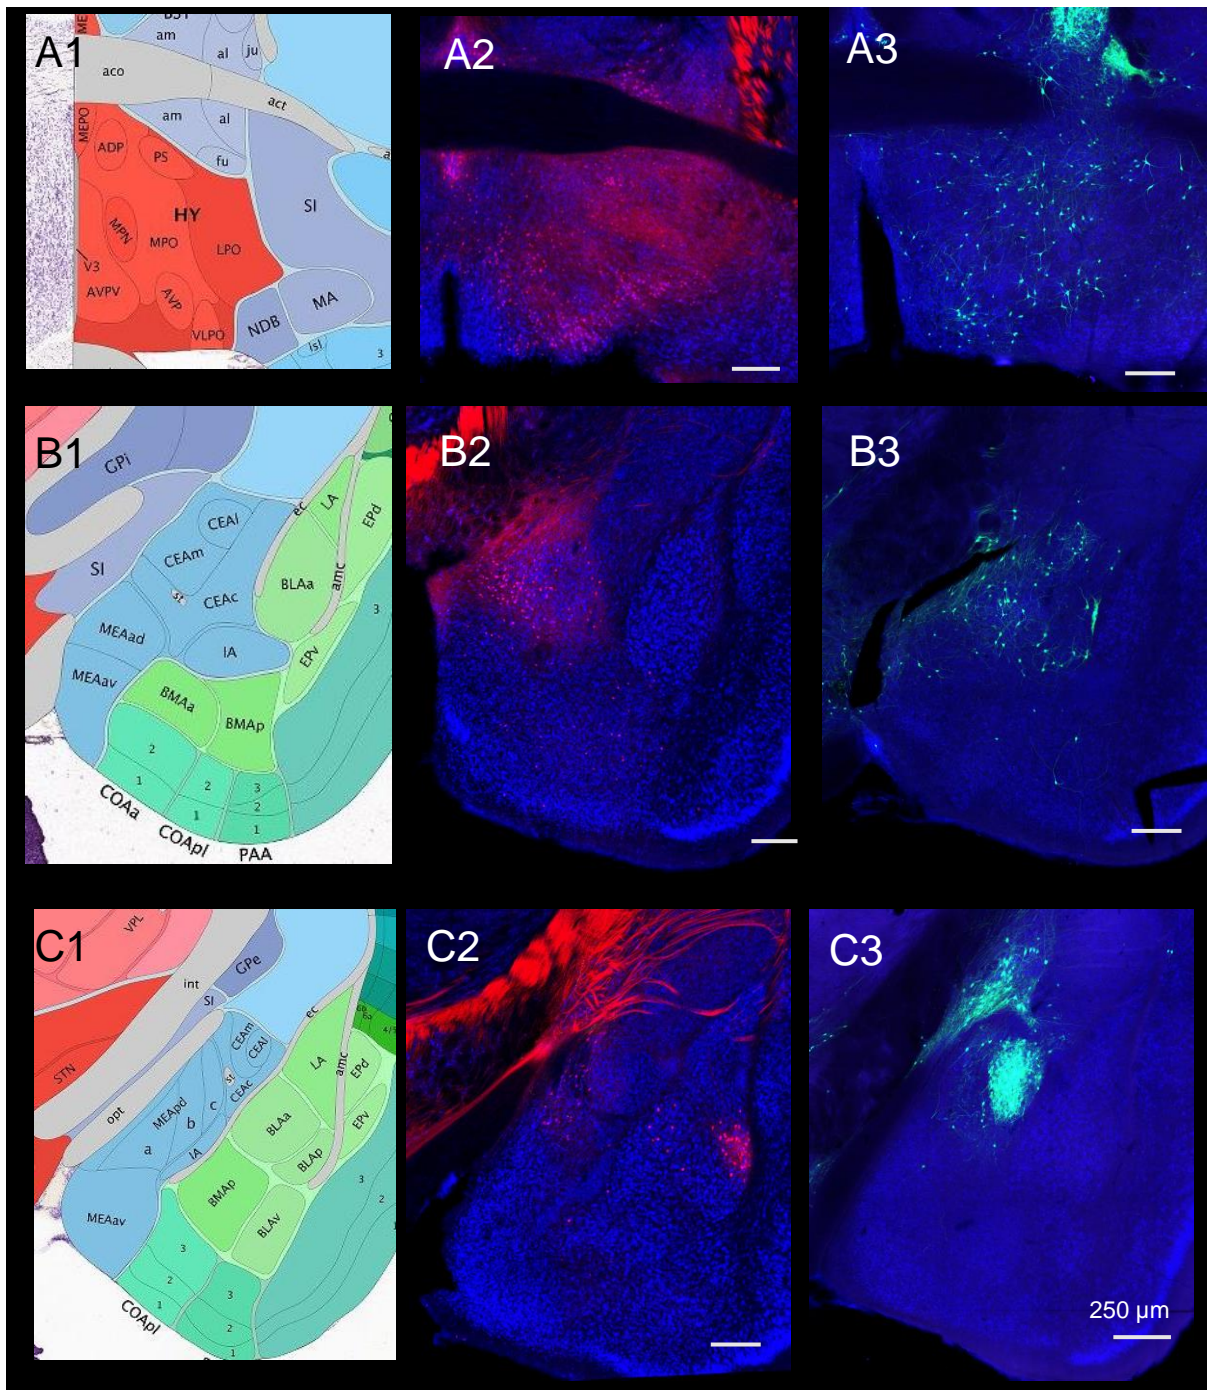

Supplement: supp [file elife-63493-supp-v1.zip › elife_poa_e63493_Figure_4_figure_supplement_2.pdf]
