# Supplementary material for: Circuit and synaptic organization of forebrain-to-midbrain pathways that promote and suppress vocalization
Source: eLife journal article supplement (doi:10.7554/elife.63493), 2020-12-29
Supplement: supp [file elife-63493-supp-v1.zip › elife_poa_e63493_Figure_4_source_data_1.xlsx]

## Sheet: ISH (Fig 4C, N=2 mice)
mouse 1 (VM115)
section info	VGAT+	Vglut+	total scored			summary
section 001	13	4	17				VGAT	vglut2	total
section 002	22	4	26			VM115	192	20	212
section 003	53	8	61			VM116	200	16	216
section 004	104	4	108
							392	36	428
total	192	20	212				0.915888	0.0841121
proportion of total	0.90566	0.0943396
mouse 2 (VM116)
section info	VGAT+	Vglut+	total scored
section 001	34	7	41
section 002	31	2	33
section 003	18	4	22
section 004	49	2	51
section 005	35	1	36
section 006	33	0	33
total	200	16	216
proportion of total	0.925926	0.0740741

## Sheet: Opto Summary (Fig 4D)
experimental animals						control animals									1	2	3
viral strategy		mean usv counts				type of control		mean usv counts
	mouse ID	pre	laser	post			mouse ID	pre	laser	post
retro-Cre	VM118	6.21429	2.42857	4.85714		dummy cable	VM118	5.57143	3.57143	3.09524
retro-Cre	VM159	6.48571	0.342857	1.11429		dummy cable	VM159	5.68966	4	3.17241
retro-Cre	VM218	5.54386	1.92982	3.35088		dummy cable	VM218	6.21429	3.82143	4.25
retro-Cre	Amg;Ai14	4.80682	1.46591	4.25		dummy cable	VM169	6.90476	4.16667	3.92857
retro-Cre	VM46	7.15385	0.307692	4		dummy cable	VM185	7.04878	3.7561	4
retro-Cre	VM 69	7.85366	1.2439	6.65854		dummy cable	VM200	6.34146	3.09756	2.17073
retro-Cre	VM 72	3	0.285714	1.28571		dummy cable	VM181	8.5	5.875	5.5625
retro-Cre	VM 73	5.23333	0.666667	2.03333		dummy cable	VM193	7.41667	4.875	4.16667
retro-ChR2	VM169	6.52778	0.638889	3.41667		dummy cable	VM202	5.85	3.45	3.5
retro-ChR2	VM170	6.37838	2.02703	4.08108
retro-ChR2	VM185	6.62162	1.72973	3.2973		no laser	VM218	5.48148	4.33333	3.11111
retro-ChR2	VM200	6.4	1.04444	4.4		no laser	VM170	6.03704	4.55556	3.66667
						no laser	VM200	7.38462	5.19231	4.65385
						no laser	VM176	6.27586	4.75862	3.44828
VGAT terminals	VM181	7.36364	1.56061	1.87879		no laser	VM181	7.15385	6.69231	5.30769
VGAT terminals	VM193	6.35714	1.92857	2.73214		no laser	VM193	5.36364	5.13636	5.13636
VGAT terminals	VM202	6.52632	1.05263	2		no laser	VM202	4.90909	2.54545	1.27273
						GFP control	VM205	6.21622	4.64865	3.75676
						GFP control	VM208	6.7	3.625	2.2
						GFP control	VM209	6.06667	4.2	3.33333
						GFP control	VM220	6.34375	3.84375	3.625
data normalized to pre-laser baseline for plotting							normalized light only
experimental animals						control animals
viral strategy		mean usv counts				type of control		mean usv counts
	mouse ID	pre	laser	post			mouse ID	pre	laser	post
retro-Cre	VM118	1	0.390805	0.781609		dummy cable	VM118	1	0.641026	0.555556
retro-Cre	VM159	1	0.0528634	0.171806		dummy cable	VM159	1	0.70303	0.557576
retro-Cre	VM218	1	0.348101	0.60443		dummy cable	VM218	1	0.614943	0.683908
retro-Cre	VM169	1	0.0978723	0.523404		dummy cable	VM169	1	0.603448	0.568966
retro-Cre	VM170	1	0.317797	0.639831		dummy cable	VM185	1	0.532872	0.567474
retro-Cre	VM185	1	0.261224	0.497959		dummy cable	VM200	1	0.488462	0.342308
retro-Cre	VM200	1	0.163194	0.6875		dummy cable	VM181	1	0.691176	0.654412
retro-Cre	Amg;Ai14	1	0.304965	0.884161		dummy cable	VM193	1	0.657303	0.561798
retro-ChR2	VM46	1	0.0430108	0.55914		dummy cable	VM202	1	0.589744	0.598291
retro-ChR2	VM 69	1	0.158385	0.847826
retro-ChR2	VM 72	1	0.0952381	0.428571			mean	1	0.613556	0.565587
retro-ChR2	VM 73	1	0.127389	0.388535			stdev	0	0.0702928	0.0955295
	mean	1	0.196737	0.584564		no laser	VM218	1	0.790541	0.567568
	stdev	0	0.121698	0.203817		no laser	VM170	1	0.754601	0.607362
						no laser	VM200	1	0.703125	0.630208
VGAT terminals	VM181	1	0.211934	0.255144		no laser	VM176	1	0.758242	0.549451
VGAT terminals	VM193	1	0.303371	0.429775		no laser	VM181	1	0.935484	0.741935
VGAT terminals	VM202	1	0.16129	0.306452		no laser	VM193	1	0.957627	0.957627
						no laser	VM202	1	0.518519	0.259259
	mean	1	0.225532	0.330457
	stdev	0	0.0720096	0.0897564			mean	1	0.77402	0.616201
							stdev	0	0.147754	0.210904
						GFP controls	VM205	1	0.747826	0.604348
						GFP controls	VM208	1	0.541045	0.328358
						GFP controls	VM209	1	0.692308	0.549451
						GFP controls	VM220	1	0.605911	0.571429
							mean	1	0.646772	0.513396
							stdev	0	0.0915301	0.125405
		0	0.0915301	0.125405
