# Supplementary material for: Circuit and synaptic organization of forebrain-to-midbrain pathways that promote and suppress vocalization
Source: eLife journal article supplement (doi:10.7554/elife.63493), 2020-12-29
Supplement: supp [file elife-63493-supp-v1.zip › elife_poa_e63493_Figure_5_source_data_1.xlsx]

## Sheet: IV Curve Example Cell (Fig. 5D)
VM239, Cell 3
Voltage (mV)	Current (pA)
	TTX	SR
-100	-87.7757	-59.4698
-80	-31.2383	-13.8116
-60	-12.8632	36.2009
-40	88.1092	34.1172
-20	201.315	-7.96385
0	354.802	8.20157
20	524.401	28.164
40	648.999	-11.1547

## Sheet: IPSC amplitudes (Fig. 5F)
Animal	Cell #	Pharm	Current at 0mv			Summary
VM149	1	TTX/4AP	102.028			Condition	Mean	Stdev	Count	Sterror
		SR	1.2143			TTX/4AP	180.227	121.499	16	30.3747
						SR-95531	24.611	15.8315	10	5.00637
	2	TTX/4AP	42.0131
VM165	3	TTX/4AP	69.2924			data re-organized for summary
VM166	4	TTX/4AP	297.233			cell number	1	2	3	4	5	6	7	8	9	10	11	12	13	14	15	16
		SR	45.1727			TTX/4AP current	102.028	42.0131	69.2924	297.233	54.8088	65.1865	58.7032	309.583	200.189	354.802	435.985	138.543	72.6609	191.236	189.883	301.479
						SR current	1.2143			45.1727	11.2034		22.6909	44.6553		8.20157			7.94839	28.025	40.32	36.6784
	5	TTX/4AP	54.8088
		SR	11.2034
VM216	6	TTX/4AP	65.1865
VM238	7	TTX/4AP	58.7032
		SR	22.6909
	8	TTX/4AP	309.583
		SR	44.6553
	9	TTX/4AP	200.189
VM239	10	TTX/4AP	354.802
		SR	8.20157
VM242	11	TTX/4AP	435.985
	12	TTX/4AP	138.543
	13	TTX/4AP	72.6609
		SR	7.94839
VM243	14	TTX/4AP	191.236
		SR	28.025
	15	TTX/4AP	189.883
		SR	40.32
VM244	16	TTX/4AP	301.479
		SR	36.6784

## Sheet: Connected vs Unconn (Fig. 5F)
Animal	Connected	Not connected
VM149	3	2
VM165	1	0
VM166	2	3
VM216	1	0
VM238	3	2
VM239	1	1
VM242	4	3
VM243	2	2
VM244	1	0
sum	18	13
proportion	0.580645	0.419355
total cells	31
