# Supplementary material for: Circuit and synaptic organization of forebrain-to-midbrain pathways that promote and suppress vocalization
Source: eLife journal article supplement (doi:10.7554/elife.63493), 2020-12-29
Supplement: supp [file elife-63493-supp-v1.zip › elife_poa_e63493_Figure_6_figure_supplement_1.pdf]

## Figure 6-figure supplement 1: POA neurons provide direct inhibition onto few PAG-USV neurons

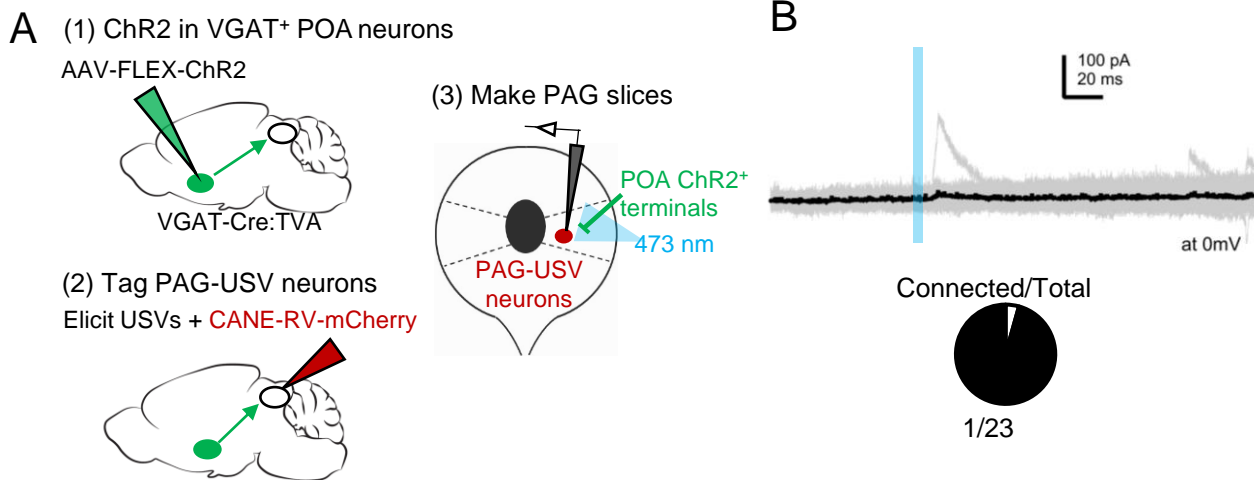

**Figure S10, related to Figure 6. POA neurons provide direct inhibition onto few PAG-USV neurons.**

(A) Viral strategy (left) and schematic (right) for whole-cell patch clamp recordings from fluorescently identified PAG-USV cells while optogenetically activating POA<sub>PAG</sub> axons. (B) Light-evoked IPSCs were observed in 1 of 23 mCherry-labeled PAG-USV neurons recorded from 7 mice. See also Figure S10-Source Data 1.
