# Supplementary material for: Circuit and synaptic organization of forebrain-to-midbrain pathways that promote and suppress vocalization
Source: eLife journal article supplement (doi:10.7554/elife.63493), 2020-12-29
Supplement: supp [file elife-63493-supp-v1.zip › elife_poa_e63493_Figure_6_figure_supplement_1_source_data_1.xlsx]

## Sheet: Connnected vs Uncon (Fig. S10B)
mouse ID	Connected	Unconnected
VM296	0	4
VM297	1	5
VM295	0	3
VM294	0	5
VM272	0	2
VM164	0	2
VM163	0	1
count	1	22
proportion	0.0434783	0.956522
total	23
