# Supplementary material for: Circuit and synaptic organization of forebrain-to-midbrain pathways that promote and suppress vocalization
Source: eLife journal article supplement (doi:10.7554/elife.63493), 2020-12-29
Supplement: supp [file elife-63493-supp-v1.zip › elife_poa_e63493_Figure_6_source_data_1.xlsx]

## Sheet: IPSC Amplitudes (Fig. 6D)
Animal	Cell #	Pharmacology	Current at 0 mV			Summary	Mean	Stdev	Count	Sterror
VM96	1	Cntrl	370.111			Baseline	300.927	227.551	10	71.958
		TTX+4AP	375.994			TTX+4AP	404.855	541.065	22	115.355
		SR	-9.19045			SR-95531	18.4471	31.4149	13	8.71291
	2	Cntrl	201.878
		NBQX/AP5	195.632			data re-organized for summary
		SR	10.6578			cell	1	2	3	4	5	6	7	8	9	10	11	12	13	14	15	16	17	18	19	20	21	22	23	24	25	26
						Cntrl	370.111	201.878	451.951	179.651	190.017	152.068	66.7361	216.71	907.935	272.217
VM95	3	Cntrl	451.951			TTX+4AP	375.994			56.5123		191.171	59.1596	157.123	1294.48		463.412	213.842	725.945	381.89	98.0425	110.885	103.673	116.264	55.584	2492.49	289.074	248.741	125.616	361.98	799.993	184.942
		NBQX/AP5	233.171			SR	-9.19045	10.6578	12.1829													26.6738	-36.1596	-27.8169	38.5141	-16.2515		36.2307	35.7982	47.2809	68.3033	53.5884
		SR	12.1829
VM110	4	Cntrl	179.651
		TTX+4AP	56.5123
VM124	5	Cntrl	190.017
VM119	6	Cntrl	152.068
		TTX+4AP	191.171
	7	Cntrl	66.7361
		TTX+4AP	59.1596
	8	Cntrl	216.71
		TTX+4AP	157.123
VM120	9	Cntrl	907.935
		TTX+4AP	1294.48
	10	Cntrl	272.217
VM139	11	TTX+4AP	463.412
	12	TTX+4AP	213.842
	13	TTX+4AP	725.945
	14	TTX+4AP	381.89
	15	TTX+4AP	98.0425
VM140	16	TTX+4AP	110.885
		SR	26.6738
	17	TTX+4AP	103.673
		SR	-36.1596
	18	TTX+4AP	116.264
		SR	-27.8169
VM277	19	TTX+4AP	55.584
		SR	38.5141
	20	TTX+4AP	2492.49
		SR	-16.2515
VM278	21	TTX+4AP	289.074
	22	TTX+4AP	248.741
		SR	36.2307
	23	TTX+4AP	125.616
		SR	35.7982
	24	TTX+4AP	361.98
		SR	47.2809
VM279	25	TTX+4AP	799.993
		SR	68.3033
	26	TTX+4AP	184.942
		SR	53.5884

## Sheet: Connected vs Uncon (Fig. 6D)
Animal	Connected	Unconnected
96	2	0
95	1	0
110	1	0
124	1	4
119	3	0
120	2	2
139	5	1
140	3	2
277	2	0
278	4	1
279	2	0
count	26	10
proportion	0.722222	0.277778
total	36

## Sheet: IPSC Amplitudes (Fig. 6H)
Animal	Cell #	Pharm	Current at 0mv			Summary
VM194	1	TTX+4AP	688.323			Pharm	Mean	Stdev	Count	Sterror
		SR	59.0215			TTX+4AP	579.968	308.409	13	85.5371
						SR-95531	34.5466	24.7976	10	7.8417
	2	TTX+4AP	382.442
						data re-organized for summary
	3	TTX+4AP	1131.28			cell number	1	2	3	4	5	6	7	8	9	10	11	12	13
		NBQX/AP5	1273.91			TTX+4AP current	688.323	382.442	1131.28	681.733	261.44	414.764	684.03	90.8549	251.281	801.265	619.652	402.5	1130.02
		SR	28.9231			SR current	59.0215		28.9231	-21.8356	46.3528	14.6119	20.8709	34.8012	71.6036		45.6767		45.4398
VM195	4	TTX+4AP	681.733
		SR	-21.8356
	5	TTX+4AP	261.44
		SR	46.3528
	6	TTX+4AP	414.764
		SR	14.6119
		Washout	93.7215
VM196	7	TTX+4AP	684.03
		SR	20.8709
	8	TTX+4AP	90.8549
		SR	34.8012
	9	TTX+4AP	251.281
		SR	71.6036
VM197	10	TTX+4AP	801.265
	11	TTX+4AP	619.652
		SR	45.6767
	12	TTX+4AP	402.5
	13	TTX+4AP	1130.02
		SR	45.4398

## Sheet: Connected vs Uncon (Fig. 6H)
Animal	Connected	Not connected
VM194	3	0
VM195	3	1
VM196	3	1
VM197	4	1
count	13	3
proportion	0.8125	0.1875
total cells	16
