# Supplementary figures and images for: Circuit and synaptic organization of forebrain-to-midbrain pathways that promote and suppress vocalization
Source: eLife journal article supplement (doi:10.7554/elife.63493), 2020-12-29

Figure 4-figure supplement 1: Extent of cell body labeling of Amg<sub>C/M-PAG</sub> neurons

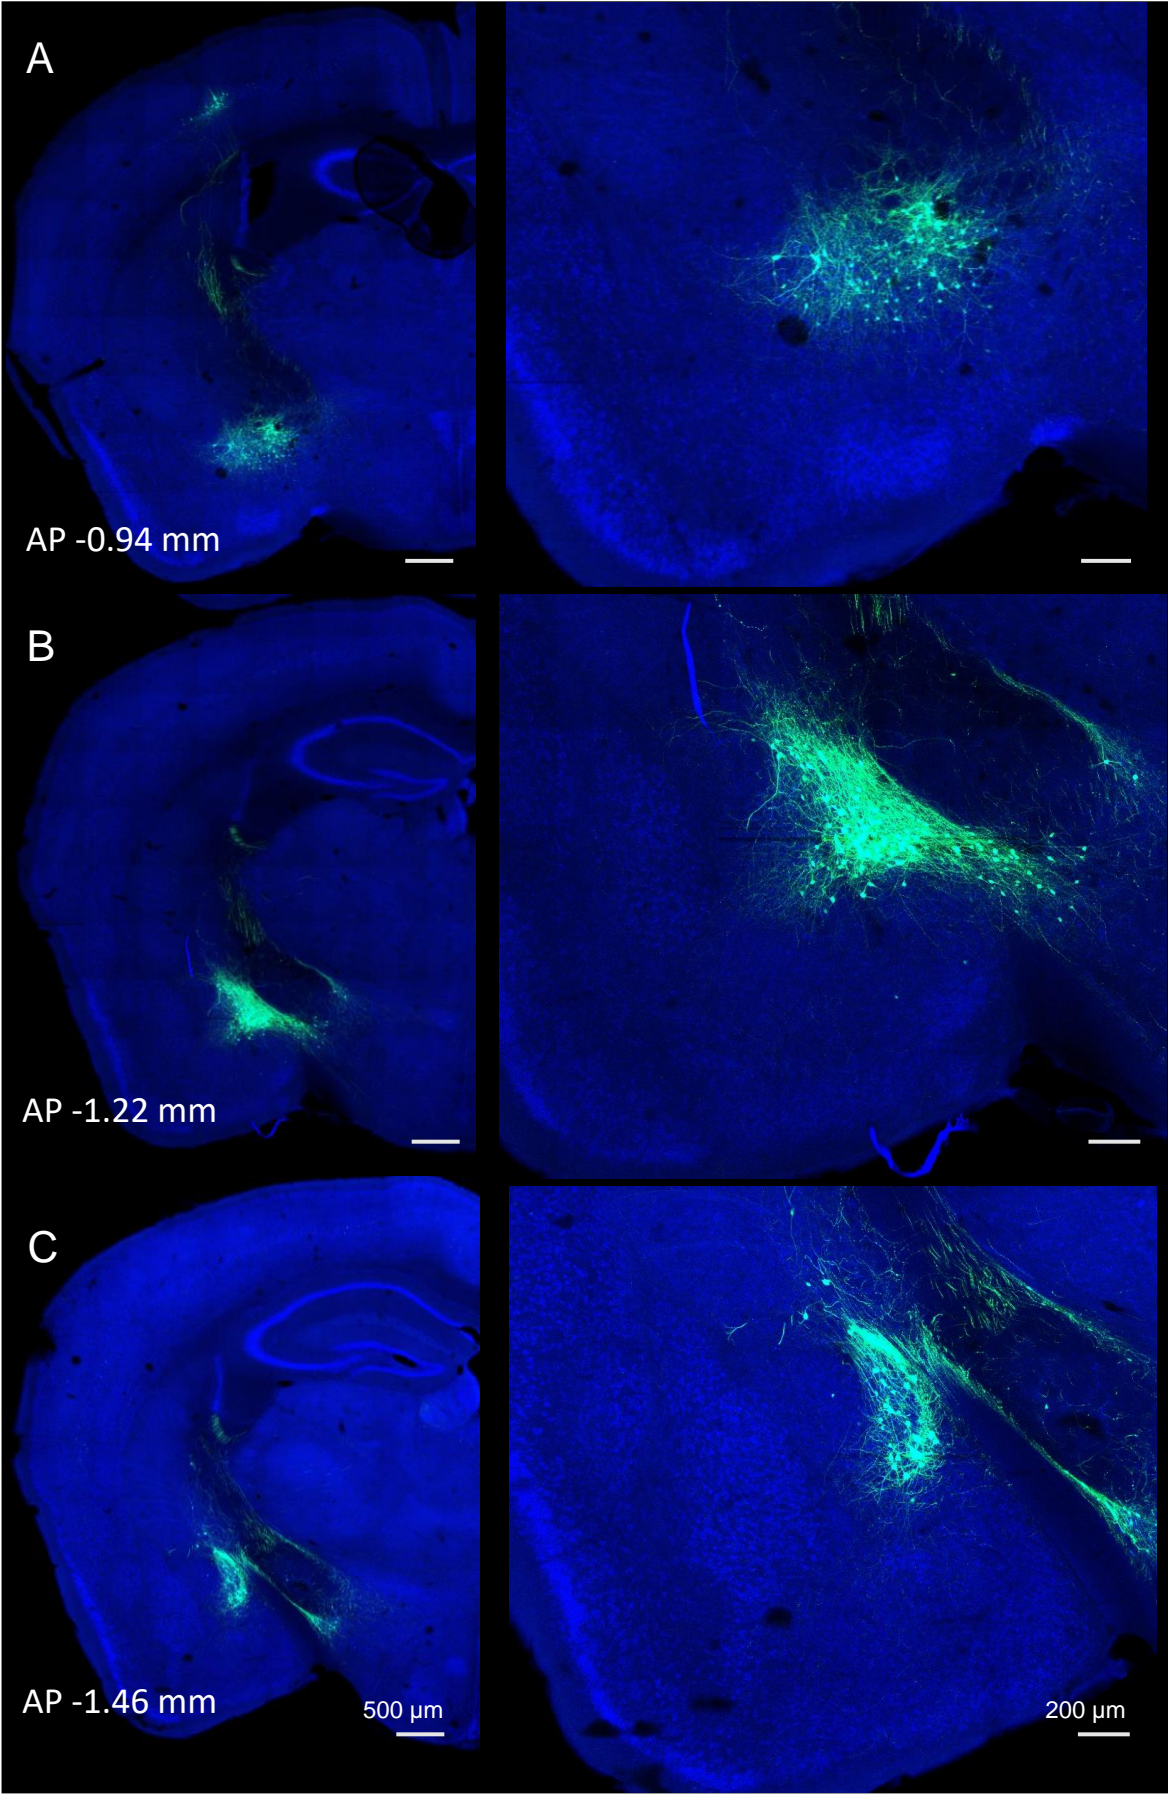

Supplement: supp [file elife-63493-supp-v1.zip › elife_poa_e63493_Figure_4_figure_supplement_1.pdf]
